# Supplementary material for: Diving apart together: call propagation in diving long-finned pilot whales
Source: Oxford University Press journal article supplement (doi:10.1242/jeb.207878), 2020-01-01
Supplement: jeb207878supp.pdf [file jeb207878supp.pdf]

SUPPLEMENTS

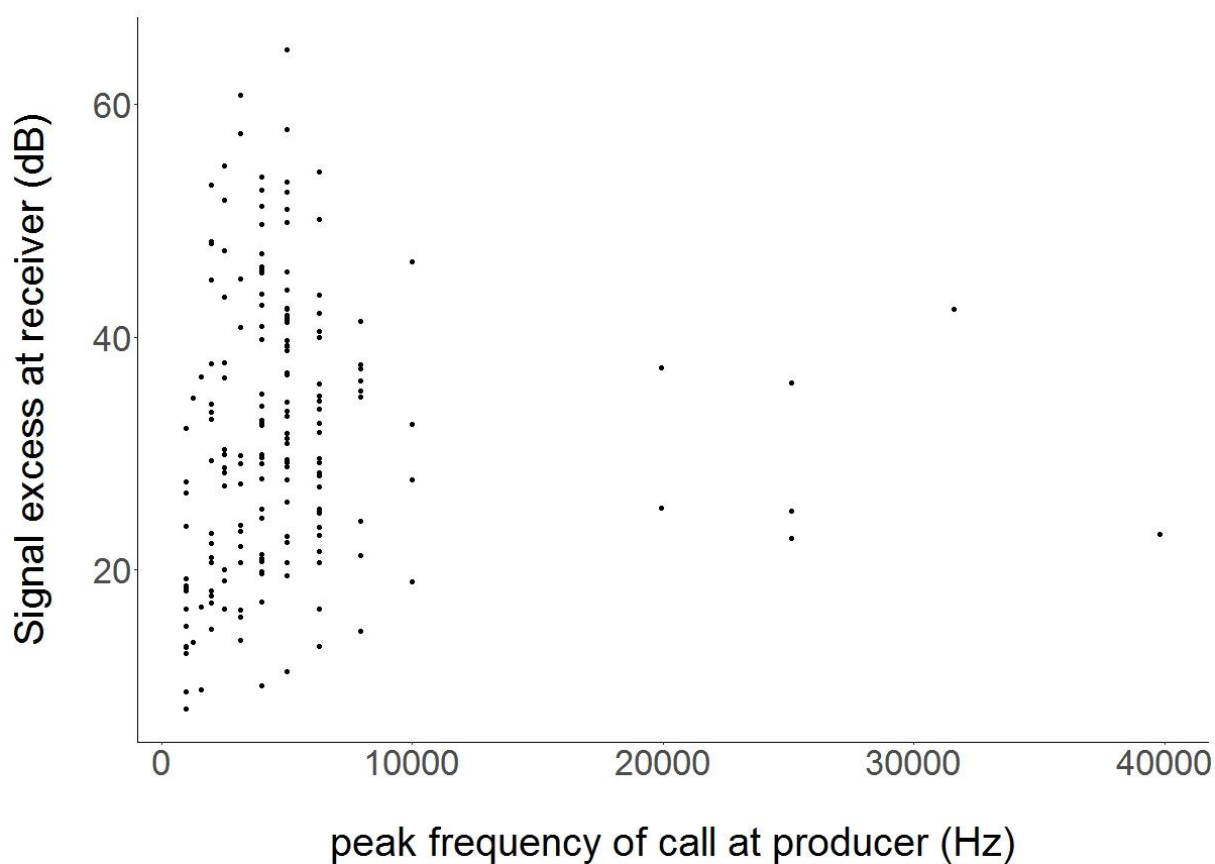

**Figure S1: Signal excess (the level of the signal above the detection threshold) of calls that were detected on the tag of the receiving whale.** These values give an indication of the audibility of the calls for the receiving whale.

**Table S1: GLM model selection for the influence of call features and environmental characteristics on call detection probability.** Selection of the best model was based on lowest Akaike Information Criterion corrected for small sample size (AICc), after which the final model was selected from all models with a non-significant difference from the lowest AICc ( $\Delta AICc < 2$ ). The final model (bold) was then selected to be the model with the lowest degrees of freedom (df). Interaction terms are indicated with “.” between variables. All variables were measured on the tag of the producer, except ambient noise levels (Noise Receiver).

| Pair     | Duration | Peak frequency | Noise Receiver | Call producer | Pair:Duration | Pair:Frequency | Pair:Noise Receiver | Pair:Call producer | Duration:Frequency | Duration:Noise Receiver | Duration:Call Producer | Noise Receiver:Call Producer | df        | R <sup>2</sup> | AICc         | $\Delta AICc$ |
|----------|----------|----------------|----------------|---------------|---------------|----------------|---------------------|--------------------|--------------------|-------------------------|------------------------|------------------------------|-----------|----------------|--------------|---------------|
| x        | x        | x              | x              | x             | x             |                | x                   | x                  | x                  |                         |                        |                              | 14        |                | 311.1        | 0             |
| <b>x</b> | <b>x</b> | <b>x</b>       | <b>x</b>       | <b>x</b>      | <b>x</b>      |                | <b>x</b>            | <b>x</b>           |                    |                         |                        |                              | <b>13</b> | <b>0.48</b>    | <b>312.3</b> | <b>1.20</b>   |
| x        | x        | x              | x              | x             | x             |                | x                   | x                  | x                  | x                       |                        |                              | 15        |                | 312.9        | 1.82          |
| x        | x        | x              | x              | x             | x             |                | x                   | x                  | x                  |                         | x                      |                              | 15        |                | 313.0        | 1.94          |

**Table S2: LM results investigating how duration, call PSD at the producer, and peak frequency were correlated with several call variables and depth.** Duration, peak frequency and depth were log transformed to maintain normality assumption. Interaction terms are indicated with “:” between variables. Only the variables retained in the final models are included.

| Model                   | Coefficients         | Estimate | SE     | T      | P       | R <sup>2</sup> | AICc   |
|-------------------------|----------------------|----------|--------|--------|---------|----------------|--------|
| <b>Duration</b>         | Intercept            | 19.59    | 4.11   |        |         | 0.21           | 150.4  |
|                         | log(Depth)           | 1.15     | 0.27   | 4.25   | <0.0001 |                |        |
|                         | Call SPSD at prod    | -0.24    | 0.045  | -5.32  | <0.0001 |                |        |
|                         | log(Frequency)       | -2.48    | 0.49   | -5.02  | <0.0001 |                |        |
|                         | Call:log(freq)       | 0.030    | 0.0055 | 5.45   | <0.0001 |                |        |
|                         | log(Depth):log(Freq) | -0.15    | 0.031  | -4.85  | <0.0001 |                |        |
| <b>Call PSD at prod</b> | Intercept            | 62.40    | 13.74  |        |         | 0.43           | 2297.8 |
|                         | log(Depth)           | -9.99    | 3.58   | -2.79  | <0.01   |                |        |
|                         | log(Duration)        | -38.49   | 9.21   | -4.18  | <0.0001 |                |        |
|                         | log(Frequency)       | 1.31     | 1.35   | 0.98   | 0.33    |                |        |
|                         | Noise at prod        | 0.38     | 0.069  | 5.57   | <0.0001 |                |        |
|                         | <i>Tag</i>           |          |        |        |         |                |        |
|                         | 137c                 | 1.70     | 1.53   | 1.11   | 0.27    |                |        |
|                         | 138a                 | -0.88    | 1.79   | -0.49  | 0.62    |                |        |
|                         | 138b                 | 11.33    | 2.59   | 4.37   | <0.0001 |                |        |
|                         | 158c                 | -2.77    | 1.83   | -1.51  | 0.13    |                |        |
|                         | 158d                 | -8.09    | 1.89   | -4.29  | <0.0001 |                |        |
|                         | log(Depth):log(Freq) | 1.32     | 0.41   | 3.21   | <0.005  |                |        |
|                         | log(Dur):log(Freq)   | 4.73     | 1.09   | 4.34   | <0.0001 |                |        |
| <b>Frequency</b>        | Intercept            | 10.82    | 0.49   |        |         | 0.57           | 466.3  |
|                         | log(Depth)           | -0.55    | 0.15   | -3.73  | <0.0005 |                |        |
|                         | Call SPSD at prod    | -0.00011 | 0.0052 | -0.021 | 0.98    |                |        |
|                         | log(Duration)        | -0.70    | 0.34   | -2.07  | <0.05   |                |        |
|                         | Noise at prod        | -0.042   | 0.0032 | -12.99 | <0.0001 |                |        |
|                         | <i>Tag</i>           |          |        |        |         |                |        |
|                         | 137c                 | -0.063   | 0.087  | -0.73  | 0.47    |                |        |
|                         | 138a                 | -0.11    | 0.10   | -1.09  | 0.28    |                |        |
|                         | 138b                 | 0.21     | 0.15   | 1.42   | 0.16    |                |        |
|                         | 158c                 | -0.35    | 0.10   | -3.57  | <0.0005 |                |        |

|                         |        |        |       |         |
|-------------------------|--------|--------|-------|---------|
| 158d                    | -0.54  | 0.10   | -5.20 | <0.0001 |
| log(Depth):log(Dur)     | -0.072 | 0.024  | -2.93 | <0.005  |
| Call at prod:log(Dur)   | 0.0097 | 0.0038 | 2.56  | <0.05   |
| log(Depth):Call at prod | 0.0063 | 0.0015 | 4.27  | <0.0001 |

---

Script 1 (rem\_click\_v2.txt)

[Click here to Download Script 1](#)

Script 2 (rem\_click\_wrapper.txt)

[Click here to Download Script 2](#)
